# Supplementary material for: A Case of Adaptive Laboratory Evolution (ALE): Biodegradation of Furfural by Pseudomonas pseudoalcaligenes CECT 5344
Source: MDPI journal article supplement (doi:10.3390/genes10070499), 2019-06-29
Supplement: s1 [file s1]

*P. pseudoalcaligenes* CECT 5344 R1D

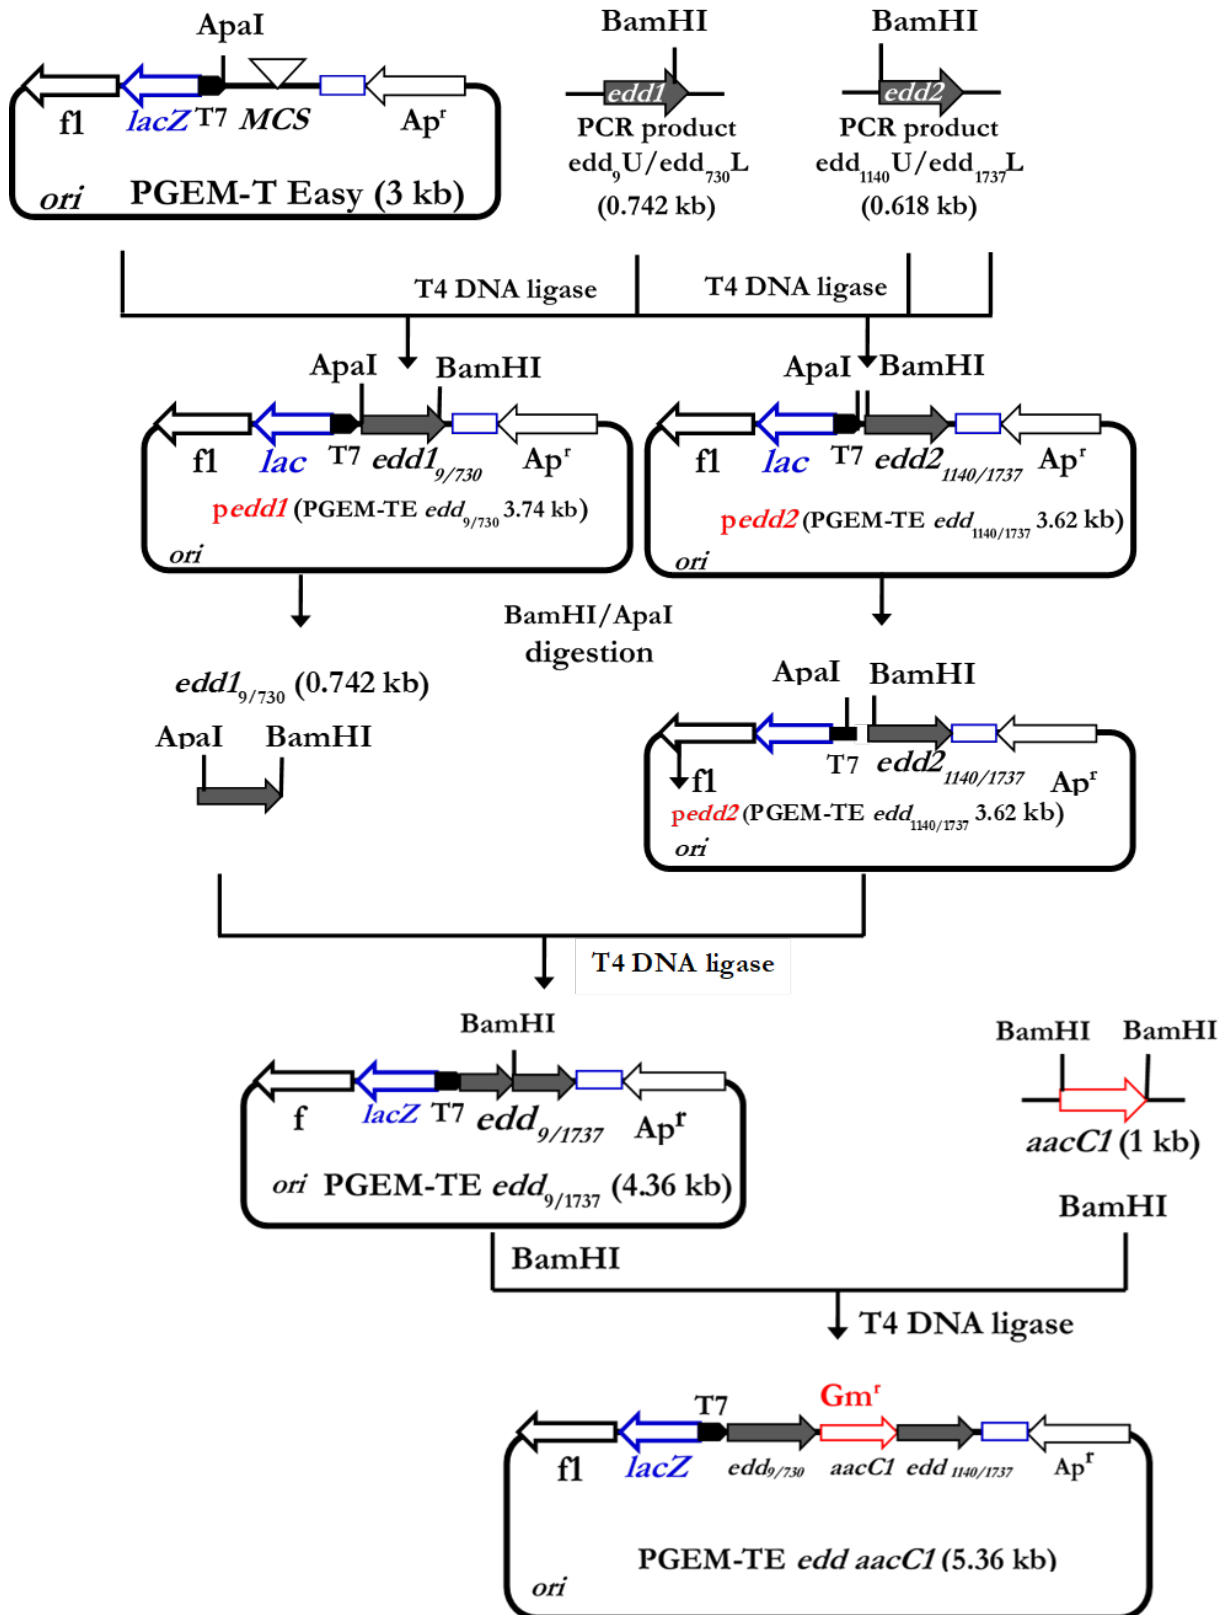

**Figure S1. Schematic construction of PGEM-TE *edd aacC1* plasmid.** T7: T7 RNA polymerase promoter; *lacZ*: β-galactosidase gene, *f1*: phage *f1* region; *ori*: plasmid replication origin, *MCS*: Multi-Cloning Site. Two DNA fragments of the *edd* gene from *P. pseudoalcaligenes* CECT 5344 were obtained by PCR using specific primers and the genomic DNA of the bacterium as template. The gentamicine resistance gene (*aacC1*), amplified separately by PCR, was inserted in between them. The resulting plasmid, that is suicide in *P. pseudoalcaligenes*, was introduced by electroporation and the resulting Gm<sup>r</sup> transformants analysed by PCR. A mutant in which the *edd* gene was interrupted by the Gm cassette by double recombination was selected for further analysis.

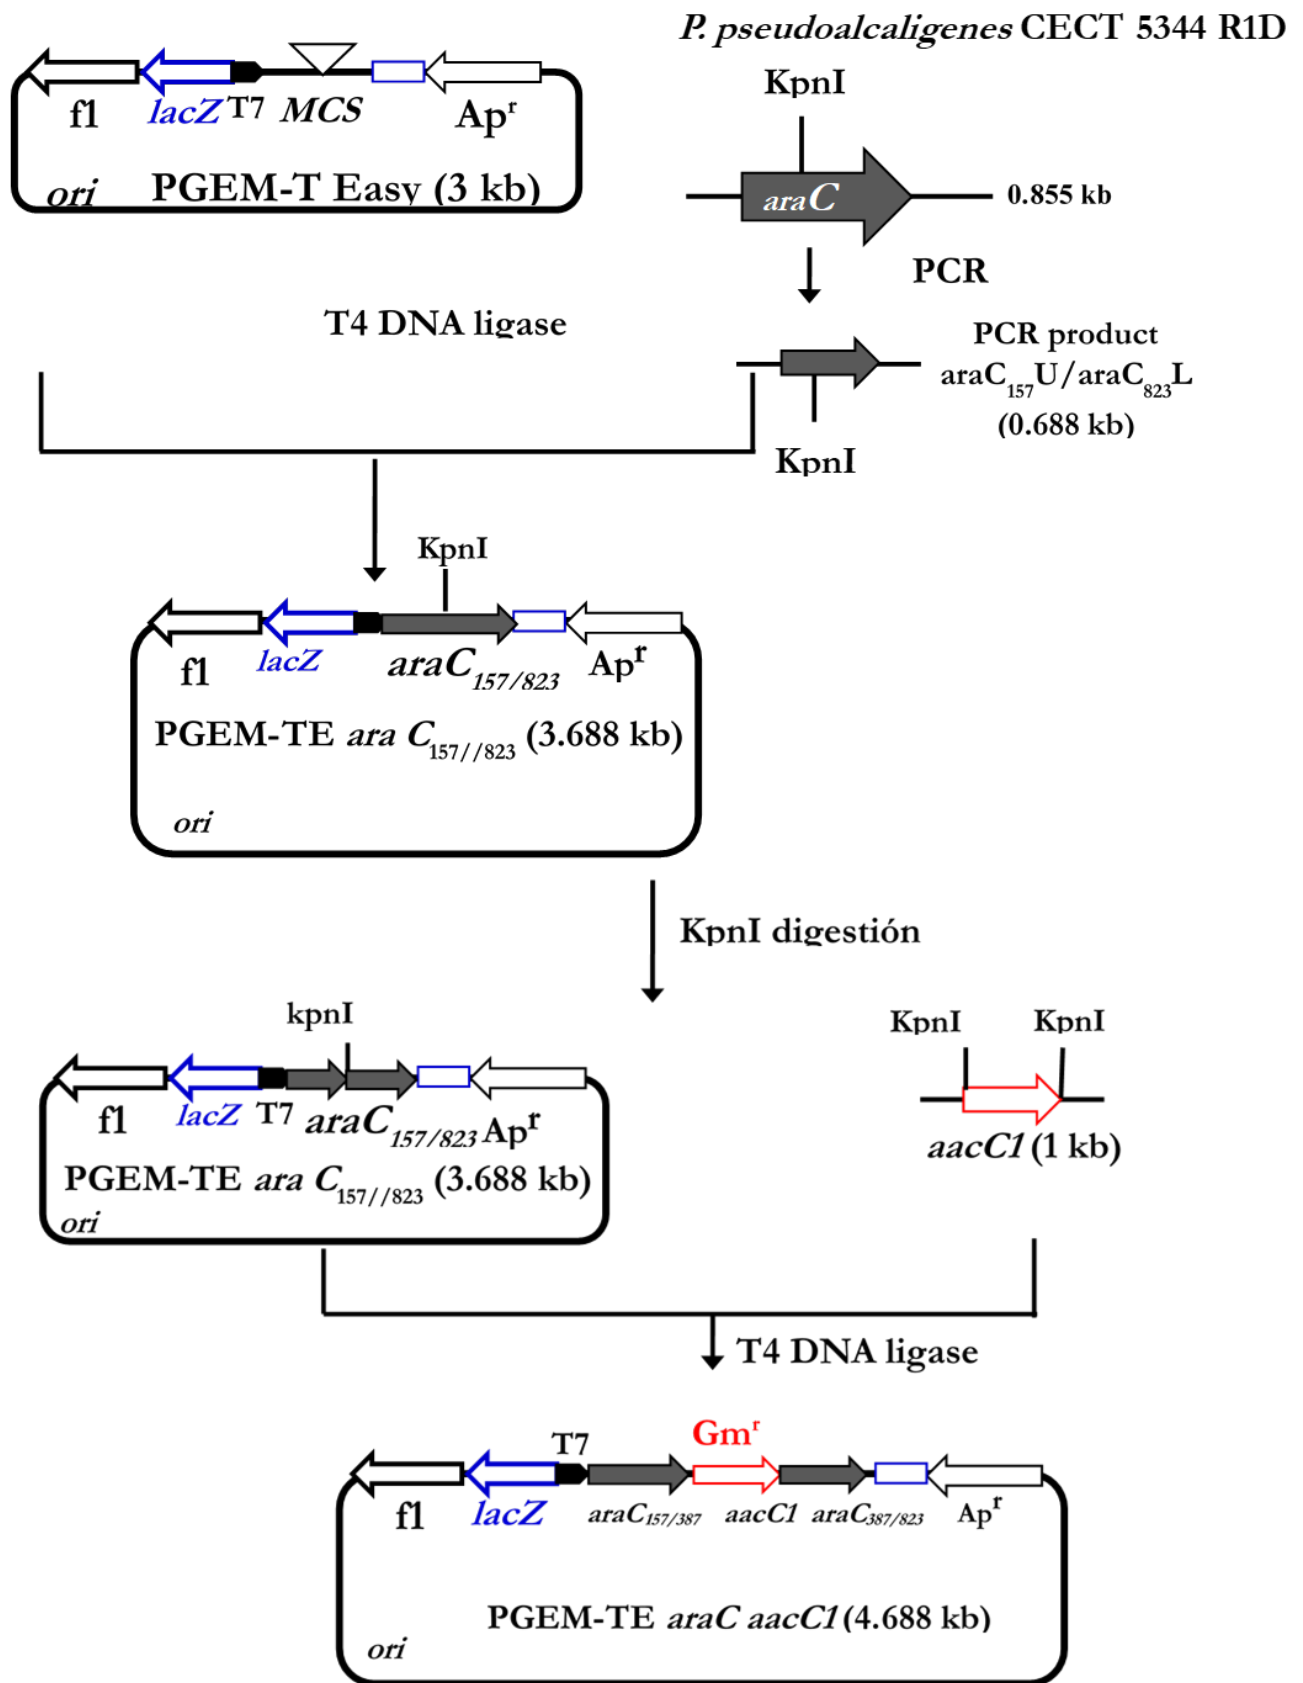

**Figure S2. Schematic construction of PGEM-TE *araC aacC1* plasmid.** T7: T7 RNA polymerase promoter; *lacZ*:  $\beta$ -galactosidase gene, *f1*: phage *f1* region; *ori*: plasmid replication origin, *MCS*: Multi-Cloning Site. An internal DNA fragment of the *araC* gene from *P. pseudoalcaligenes* CECT 5344 was obtained by PCR using specific primers and the genomic DNA of the bacterium as template. The gentamicine resistance gene (*aacC1*), amplified separately by PCR, was inserted in a existing *KpnI* site. The resulting plasmid, that is suicide in *P. pseudoalcaligenes*, was introduced by electroporation and the resulting Gm<sup>r</sup> transformants analysed by PCR. A mutant in which the *araC* gene was interrupted by the Gm cassette by double recombination was selected for further analysis.
